# Supplementary material for: Synthesis, Anticancer Activity and UPLC Analysis of the Stability of Some New Benzimidazole-4,7-dione Derivatives
Source: PubMed Central journal article supplement (PMC6271476; doi:10.3390/molecules19010400), 2013-12-31

# Supplementary Materials for Synthesis, Anticancer Activity and UPLC Analysis of the Stability of Some New Benzimidazole-4,7-dione Derivatives

## 2-(4-Chlorophenyl)-1*H*-benzimidazol-4,7-dione (5a)

IR (KBr)  $\nu/\text{cm}^{-1}$ : 3615 (NH), 1690 (C=O), 1485 (C=N);  $^1\text{H-NMR}$  (DMSO- $d_6$ )  $\delta$ : 14.5 (s, 1H, NH), 8.2 (d, 2H, CH,  $J = 7.9$  Hz), 7.6 (d, 2H, CH,  $J = 2.0$  Hz), 7.5 (d, 2H, CH,  $J = 2.0$  Hz);  $^{13}\text{C-NMR}$  (DMSO- $d_6$ )  $\delta$ : 180.0, 179.1, 150.2, 143.4, 142.8, 136.8, 135.7, 129.9, 129.3, 128.7, 127.9, ; MS  $m/z$  [M+1, M-1]: 259, 257.

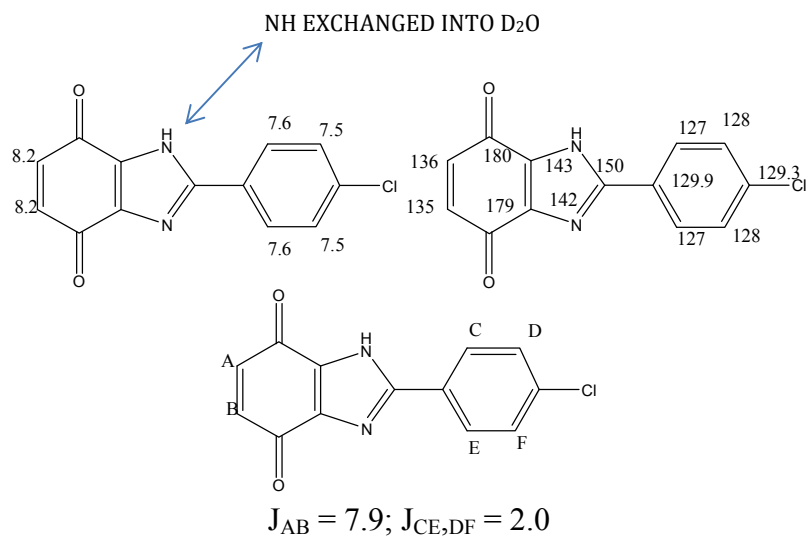

## 2-(2-Nitrophenyl)-1H-benzimidazol-4,7-dione (5b)

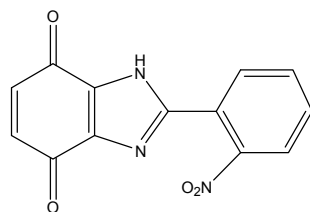

IR (KBr)  $\nu/\text{cm}^{-1}$ : 3391 (NH), 1690 (C=O), 1526 (NO<sub>2</sub>asym), 1347 (NO<sub>2</sub>sym), 1481 (C=N).

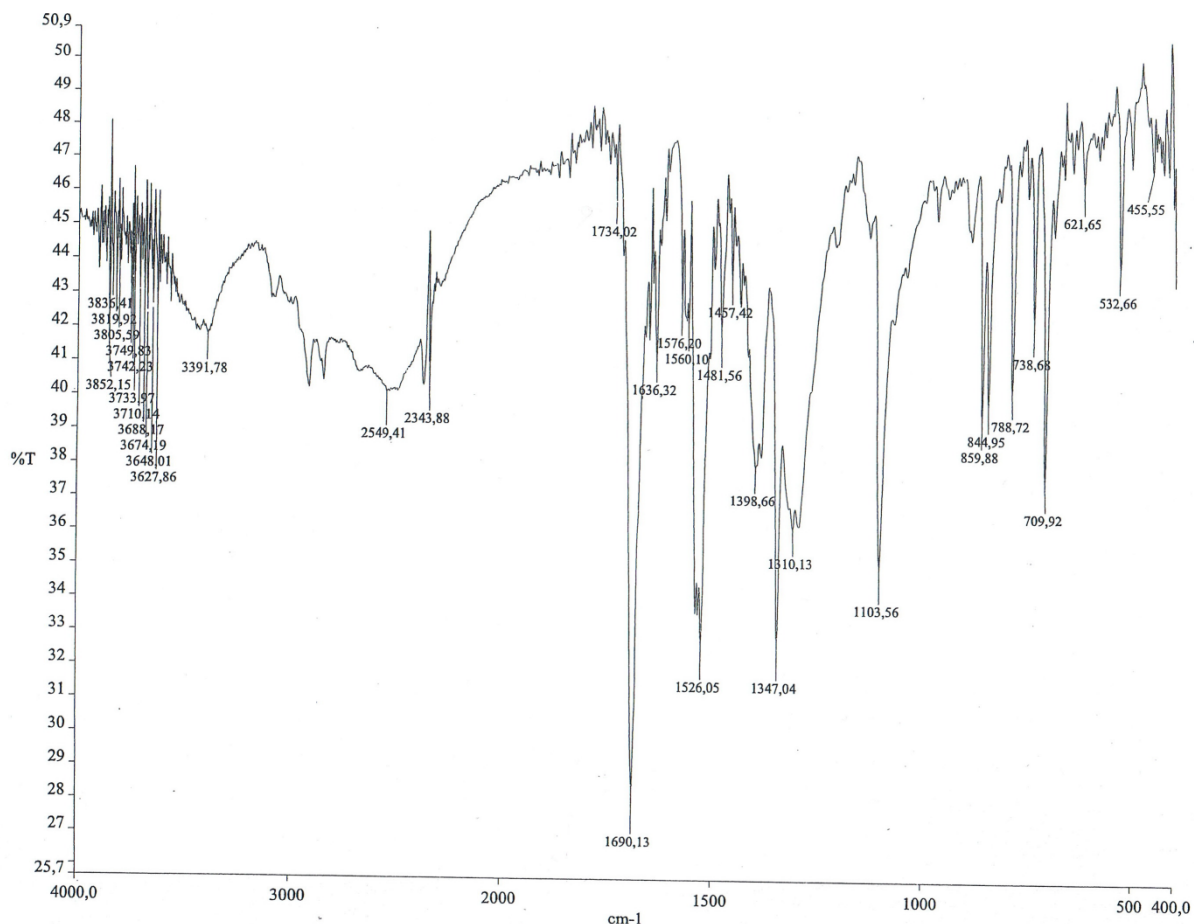

<sup>1</sup>H-NMR (DMSO-*d*<sub>6</sub>)  $\delta$ : 9.2 (s, 1H, NH), 8.1 (d, 2H, CH,  $J = 7.9$  Hz), 7.8 (m, 4H, CH); 8.1 (d, 2H, CH,  $J = 7.9$  Hz) =  $J_{AB}$ ; NH signal exchanged with D<sub>2</sub>O.

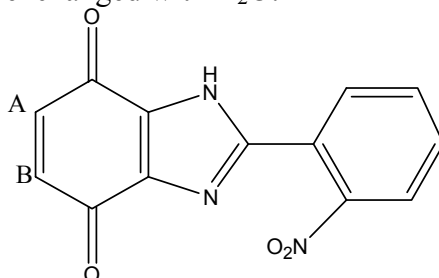

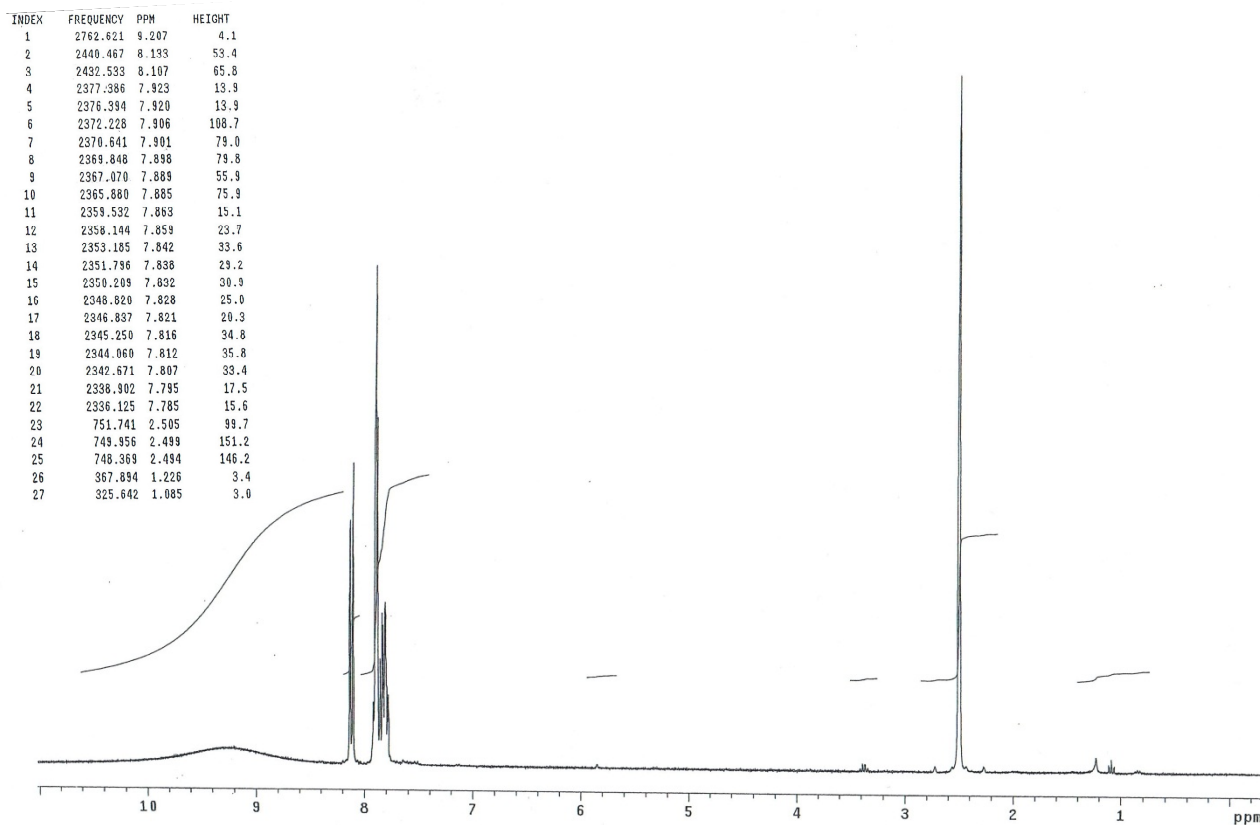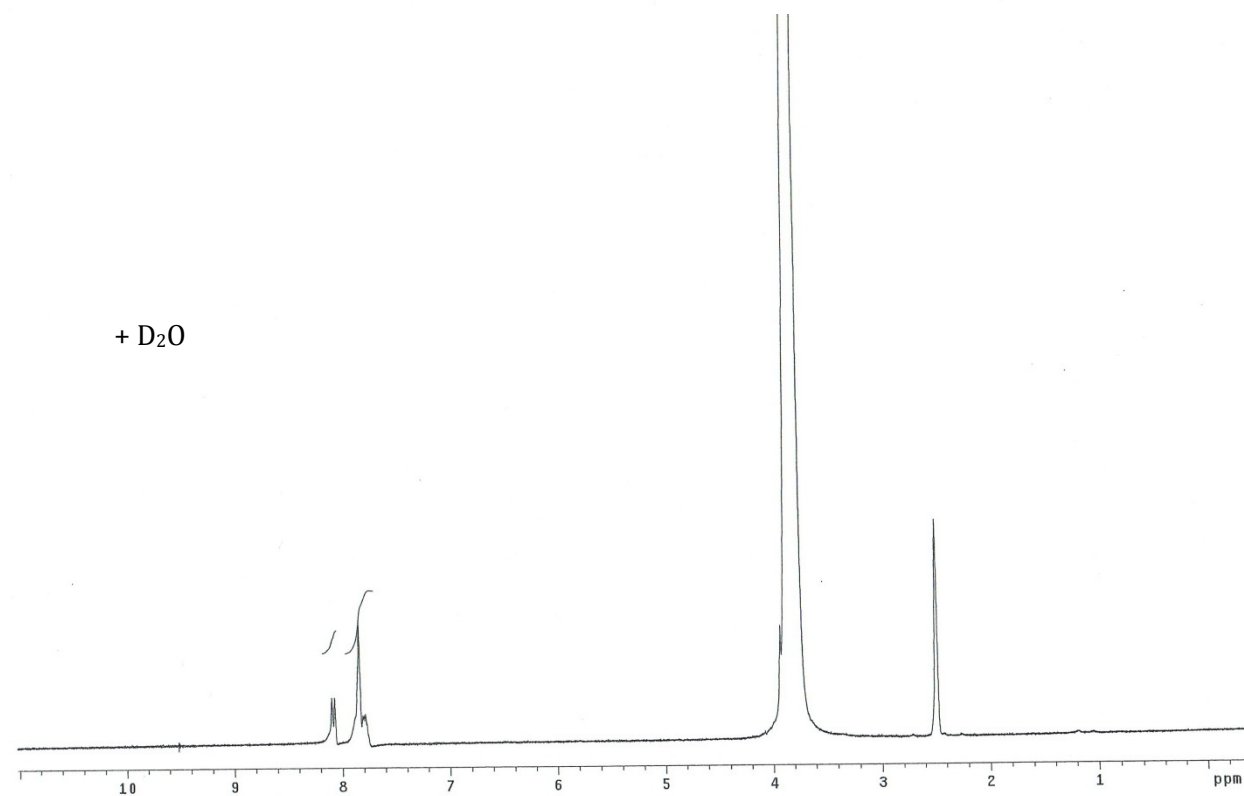

<sup>13</sup>C-NMR (DMSO-*d*<sub>6</sub>) δ: 181.2, 179.1, 148.7, 147.2, 146.7, 146.1, 142.9, 141.9, 133.1, 131.9, 128.1, 125.5, 124.6.

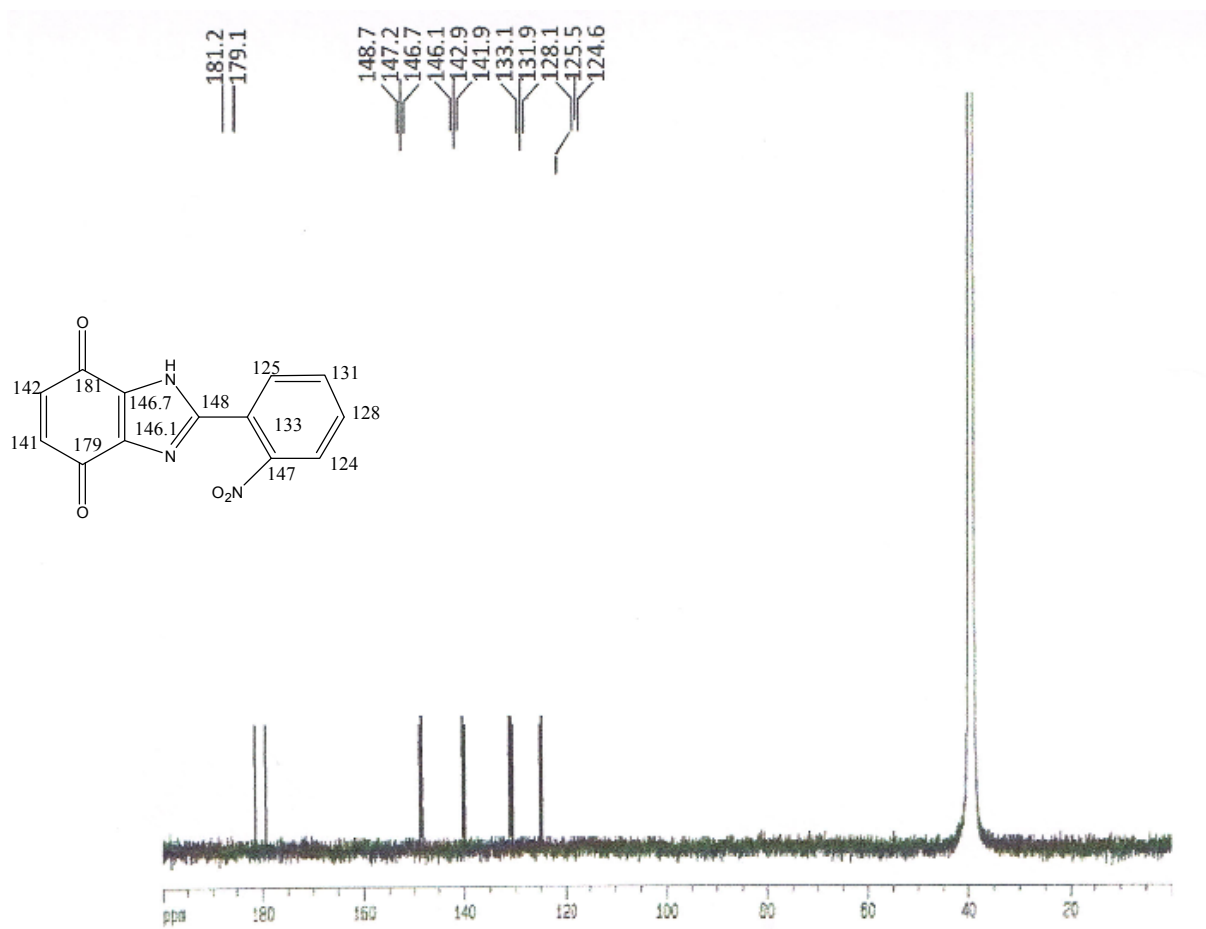

MS  $m/z$  [M+1, M-1]: 270, 268.

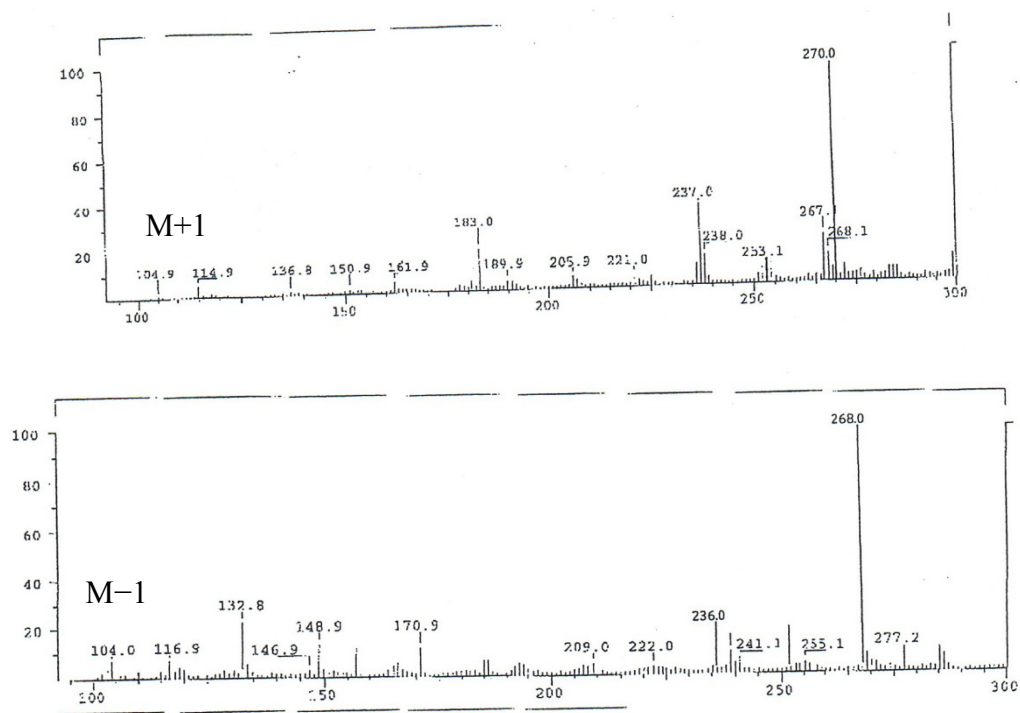

**2-Benzo[1,3]dioxol-1H-benzimidazol-4,7-dione (5c)**

IR (KBr)  $\nu/\text{cm}^{-1}$ : 3324 (NH), 2960 ( $\text{CH}_2$ ), 1701 ( $\text{C}=\text{O}$ ), 1503 ( $\text{C}=\text{N}$ ), 1264 ( $\text{C}-\text{O}-\text{C}_{\text{sym}}$ ), 1036 ( $\text{C}-\text{O}-\text{C}_{\text{asym}}$ );  $^1\text{H-NMR}$  ( $\text{DMSO}-d_6$ )  $\delta$ : 4.0 (s, 1H, NH), 7.9 (d, 2H, CH,  $J = 1.98$  Hz), 7.2 (d, 1H, CH,  $J = 7.9$  Hz), 7.0 (d, 2H, CH,  $J = 8.0$  Hz), 6.2 (s, 2H,  $\text{CH}_2$ );  $^{13}\text{C-NMR}$  ( $\text{DMSO}-d_6$ )  $\delta$ : 179.5, 179.0, 149.1, 148.6, 147.6, 142.1, 141.5, 141.3, 141.1, 129.1, 120.3, 115.1, 113.2, 91.

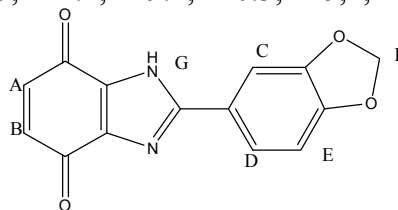

$$J_{AB} = 8.0, J_{CD} = 1.98, J_{DE} = 7.9$$

**2-Naphthyl-1H-benzimidazol-4,7-dione (5d)**

IR (KBr)  $\nu/\text{cm}^{-1}$ : 3424 (NH), 3033 (ArH), 1677 ( $\text{C}=\text{O}$ ); 1452 ( $\text{C}=\text{N}$ );  $^1\text{H-NMR}$  ( $\text{DMSO}-d_6$ )  $\delta$ : 13.0 (s, 1H, NH), 8.7 (s, 1H, CH), 8.3 (d, 2H, CH,  $J = 1.8$  Hz), 8.1 (d, 2H, CH,  $J = 8.1$  Hz), 7.9 (d, 2H, CH,  $J = 1.8$  Hz), 7.6 (d, 2H, CH,  $J = 1.8$  Hz);  $^{13}\text{C-NMR}$  ( $\text{DMSO}-d_6$ )  $\delta$ : 179.9, 179.1, 150.2, 148.6, 148.5, 147.7, 147.3, 142.2, 141.2, 134.1, 133.8, 133.6, 128.5, 126.5, 124.3.

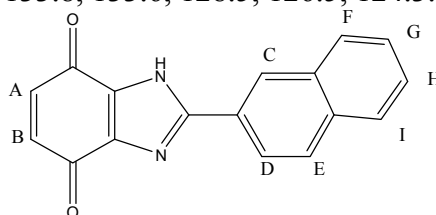

$$J_{AB} = 8.1; J_{CD} = J_{FH} = J_{IG} = 1.8$$

**2-(4-Chlorophenyl)-1H-benzimidazol-4,7-dione N-oxide (6a)**

IR (KBr)  $\nu/\text{cm}^{-1}$ : 3445 (NH), 1685 ( $\text{C}=\text{O}$ ), 1661 ( $\text{C}=\text{O}$ ), 1484 ( $\text{C}=\text{N}$ ), 1282 (N-O);  $^1\text{H-NMR}$  ( $\text{DMSO}-d_6$ )  $\delta$ : 14.5 (s, 1H, NH), 8.1 (d, 2H, CH,  $J = 8.0$  Hz), 7.6 (d, 2H, CH,  $J = 2.0$  Hz), 7.5 (d, 2H, CH,  $J = 2.0$  Hz),  $^{13}\text{C-NMR}$  ( $\text{DMSO}-d_6$ )  $\delta$ : 180.2, 179.3, 157.2, 143.1, 142.6, 136.5, 135.2, 129.8, 129.1, 128.6, 128.0; MS  $m/z$  [ $M+1$ ,  $M-1$ ]: 275, 273.

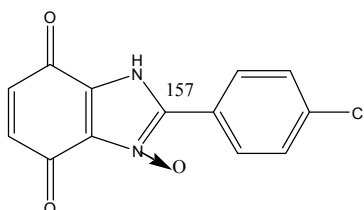

**2-(2-nitrophenyl)-1H-benzimidazol-4,7-dione N-oxide (6b)**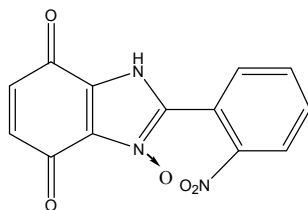

IR (KBr)  $\nu/\text{cm}^{-1}$ : 3480 (NH), 1682 (C=O), 1541 (NO<sub>2</sub>asym), 1347 (NO<sub>2</sub>sym) 1434 (C=N), **1251 (N-O)**.

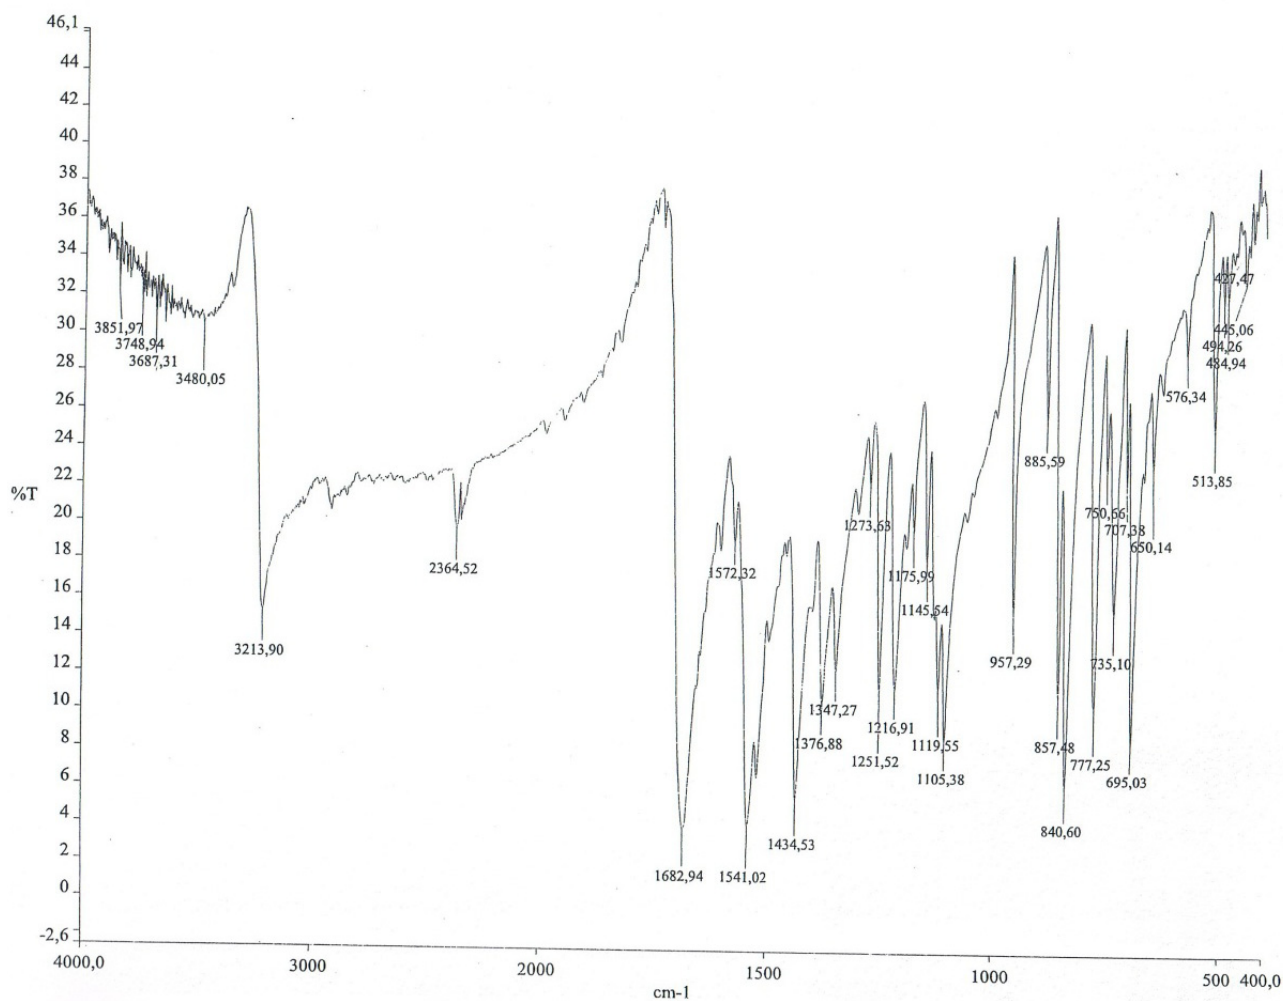

$^{13}\text{C}$ -NMR (DMSO- $d_6$ )  $\delta$ : 180.2, 179.3, 157.7, 147.6, 146.2, 146.0, 143.0, 142.4, 133.5, 131.5, 128.4, 125.3, 124.1.

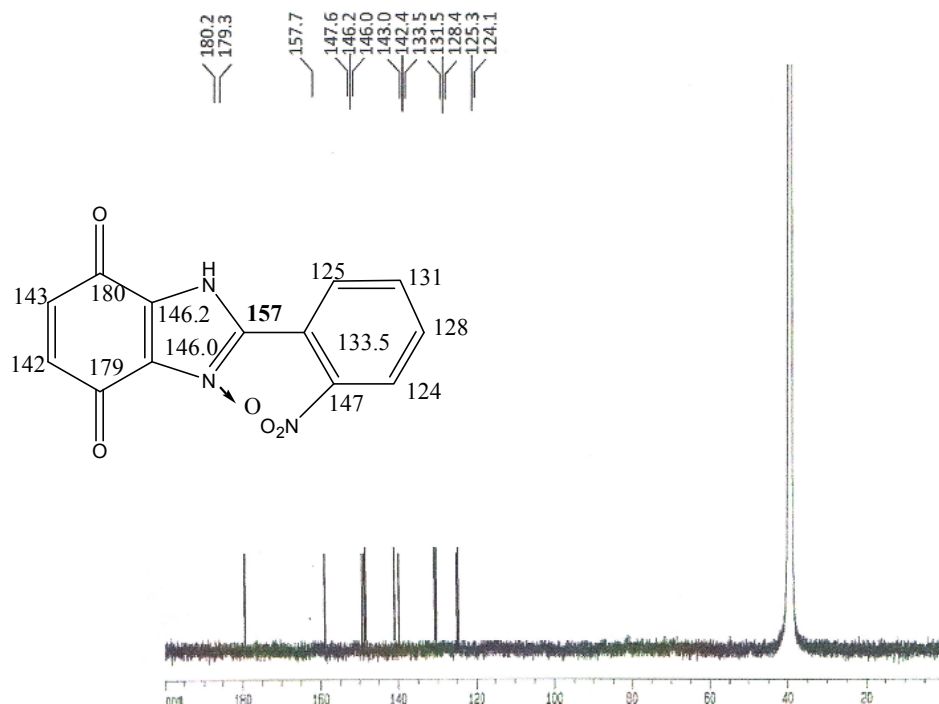

MS  $m/z$  [M+1, M-1]: 286, 284.

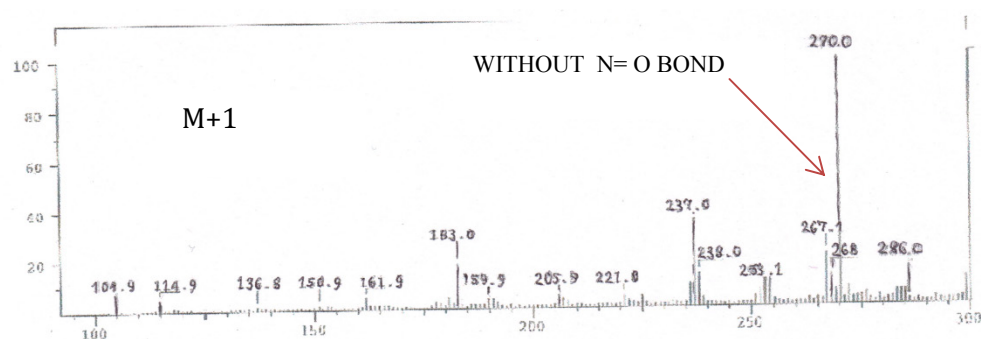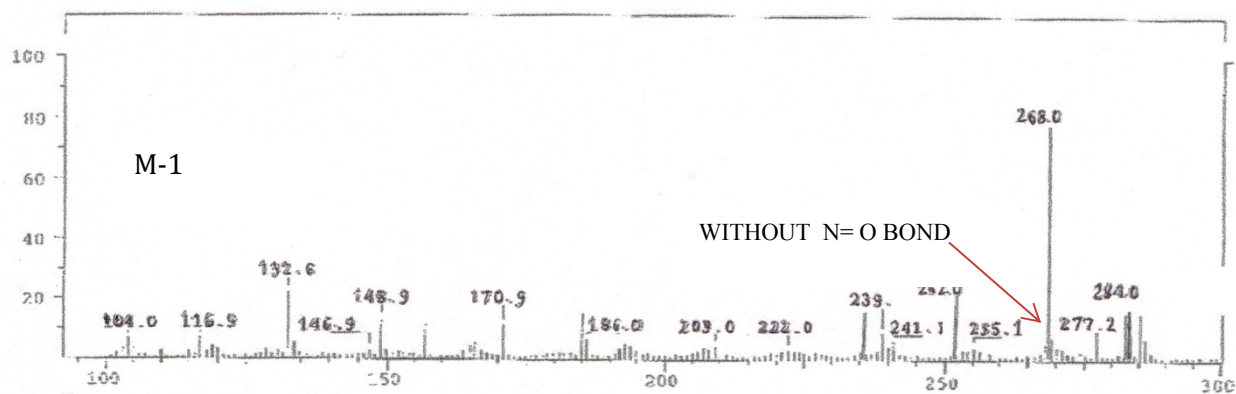

**2-Benzo[1,3]dioxol-1*H*-benzimidazol-4,7-dione *N*-oxide (6c)**

IR (KBr)  $\nu/\text{cm}^{-1}$ : 3346 (NH), 2961 (CH<sub>2</sub>), 1680 (C=O), 1470 (C=N), 1255 (C-O-Csym), 1045 (C-O-Casym), 1249 (N-O); <sup>1</sup>H-NMR (DMSO-*d*<sub>6</sub>)  $\delta$ : 10.0 (s, 1H, NH), 7.8 (d, 2H, CH, *J* = 8.1 Hz), 7.7 (d, 1H, CH, *J* = 8.0 Hz), 7.6 (d, 2H, CH, *J* = 2.0 Hz), 6.0 (s, 2H, CH<sub>2</sub>); <sup>13</sup>C-NMR (DMSO-*d*<sub>6</sub>)  $\delta$ : 18025, 179.8, 159.1, 148.2, 147.1, 142.0, 141.7, 141.5, 141.0, 129.3, 120.1, 115.5, 113.3, 91.2.

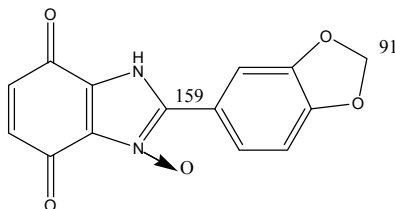**2-Naphthyl-1*H*-benzimidazol-4,7-dione *N*-oxide (6d)**

IR (KBr)  $\nu/\text{cm}^{-1}$ : 3300 (NH), 3031 (ArH), 1670 (C=O), 1465 (C=N), 1261 (N-O); <sup>1</sup>H-NMR (DMSO-*d*<sub>6</sub>)  $\delta$ : 13.1 (s, 1H, NH), 8.8 (s, 1H, CH), 8.3 (d, 2H, CH, *J* = 2.0 Hz), 8.0 (d, 2H, CH, *J* = 7.9 Hz), 7.6 (d, 2H, CH, *J* = 2.0 Hz), 7.4 (d, 2H, CH, *J* = 2.0 Hz); <sup>13</sup>C-NMR (DMSO-*d*<sub>6</sub>)  $\delta$ : 179.5, 179.2, 160.1, 147.7, 147.5, 142.6, 142.1, 141.0, 140.2, 134.3, 133.7, 133.5, 128.1, 126.2, 124.7.

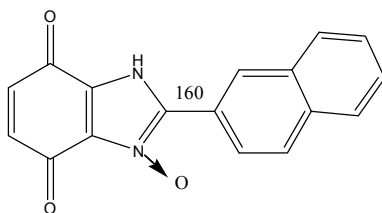



**Figure S1.** Chromatograms and UV spectrums of analysed compounds. **A** and **B**, Chromatogram and UV spectrum of **5b**; **C** and **D**, Chromatogram and UV spectrum of **6b**.

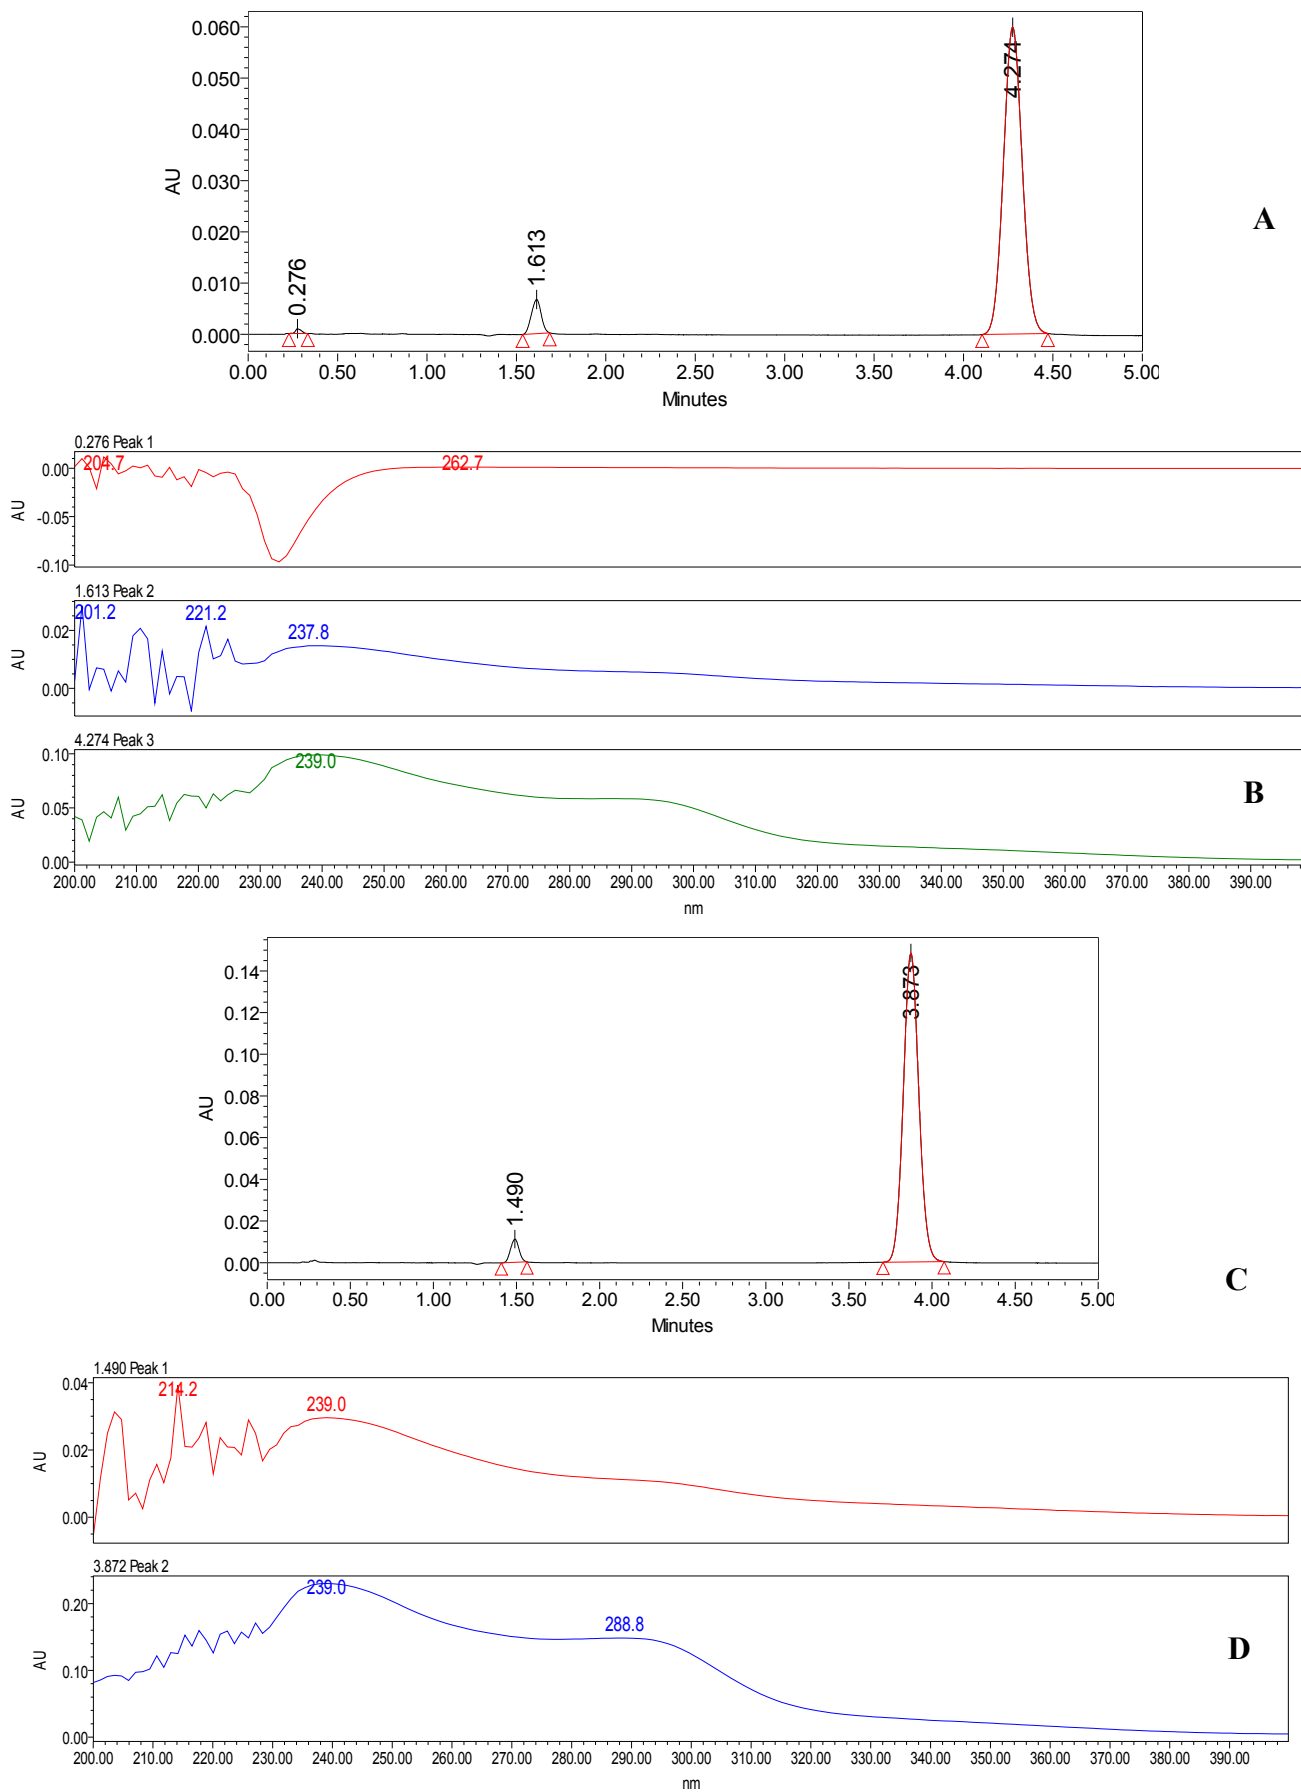

**Table S1.** Precision of the analytical method.

| Conc. (mg/mL) | Compound 5b    |                |                |                |                |                |
|---------------|----------------|----------------|----------------|----------------|----------------|----------------|
| n = 3         | 25%            | 39%            | 52%            | 57%            | 78%            | 100%           |
| $\bar{x}$     | 0.052          | 0.081          | 0.108          | 0.120          | 0.162          | 0.209          |
| S             | 0.0006         | 0.0006         | 0.0010         | 0.0006         | 0.0012         | 0.0006         |
| $\mu$         | 0.052 ± 0.0012 | 0.081 ± 0.0012 | 0.108 ± 0.0020 | 0.120 ± 0.0012 | 0.162 ± 0.0023 | 0.209 ± 0.0012 |
| RSD (%)       | 1.10           | 0.72           | 0.93           | 0.48           | 0.71           | 0.28           |
| Conc. (mg/mL) | Compound 6b    |                |                |                |                |                |
| n = 3         | 25%            | 35%            | 51%            | 63%            | 84%            | 100%           |
| $\bar{x}$     | 0.053          | 0.073          | 0.107          | 0.132          | 0.175          | 0.210          |
| S             | 0.0006         | 0.0006         | 0.0006         | 0.0010         | 0.0006         | 0.0006         |
| $\mu$         | 0.053 ± 0.0012 | 0.073 ± 0.0012 | 0.107 ± 0.0012 | 0.132 ± 0.0020 | 0.175 ± 0.0012 | 0.210 ± 0.0012 |
| RSD (%)       | 1.10           | 0.79           | 0.54           | 0.76           | 0.33           | 0.28           |

$\bar{x}$ , arithmetic mean; s, standard deviation;  $\mu$ , mean ± SD; RSD (%), relative standard deviation.

**Table S2.** Accuracy of the analytical method.

| Content of the determined substance <b>5b</b> in relation to the declared (mg/mL)   |            |                  |            |                  |            |                  |            |                  |
|-------------------------------------------------------------------------------------|------------|------------------|------------|------------------|------------|------------------|------------|------------------|
|                                                                                     | 25%        |                  | 50%        |                  | 75%        |                  | 100%       |                  |
| Samples                                                                             | Real value | Determined value | Real value | Determined value | Real value | Determined value | Real value | Determined value |
| 1                                                                                   | 0.05       | 0.05             | 0.104      | 0.104            | 0.157      | 0.157            | 0.209      | 0.209            |
| 2                                                                                   | 0.055      | 0.055            | 0.111      | 0.111            | 0.166      | 0.166            | 0.222      | 0.221            |
| 3                                                                                   | 0.026      | 0.025            | 0.052      | 0.053            | 0.078      | 0.078            | 0.104      | 0.104            |
| mean recovery (%) = 100.07; s (%) = 0.54; $\mu$ (%) = 100.07 ± 1.08; RSD (%) = 0.54 |            |                  |            |                  |            |                  |            |                  |
| Content of the determined substance <b>6b</b> in relation to the declared (mg/mL)   |            |                  |            |                  |            |                  |            |                  |
|                                                                                     | 25%        |                  | 50%        |                  | 75%        |                  | 100%       |                  |
| Samples                                                                             | Real value | Determined value | Real value | Determined value | Real value | Determined value | Real value | Determined value |
| 1                                                                                   | 0.06       | 0.06             | 0.115      | 0.115            | 0.172      | 0.172            | 0.23       | 0.23             |
| 2                                                                                   | 0.066      | 0.066            | 0.132      | 0.132            | 0.197      | 0.197            | 0.263      | 0.262            |
| 3                                                                                   | 0.06       | 0.06             | 0.125      | 0.125            | 0.187      | 0.187            | 0.25       | 0.25             |
| mean recovery (%) = 98.99; s (%) = 0.82; $\mu$ (%) = 100.07 ± 1.64; RSD (%) = 0.83  |            |                  |            |                  |            |                  |            |                  |

$\bar{x}$ , arithmetic mean; s, standard deviation;  $\mu$ , mean ± SD; RSD (%), relative standard deviation.

**Figure S2.** Cell viability of compounds **5a–b** and **6a–b** at normoxia and hypoxia conditions. Data is expressed as mean-SD, n = 3, 0—control, , T—tirapazamine.

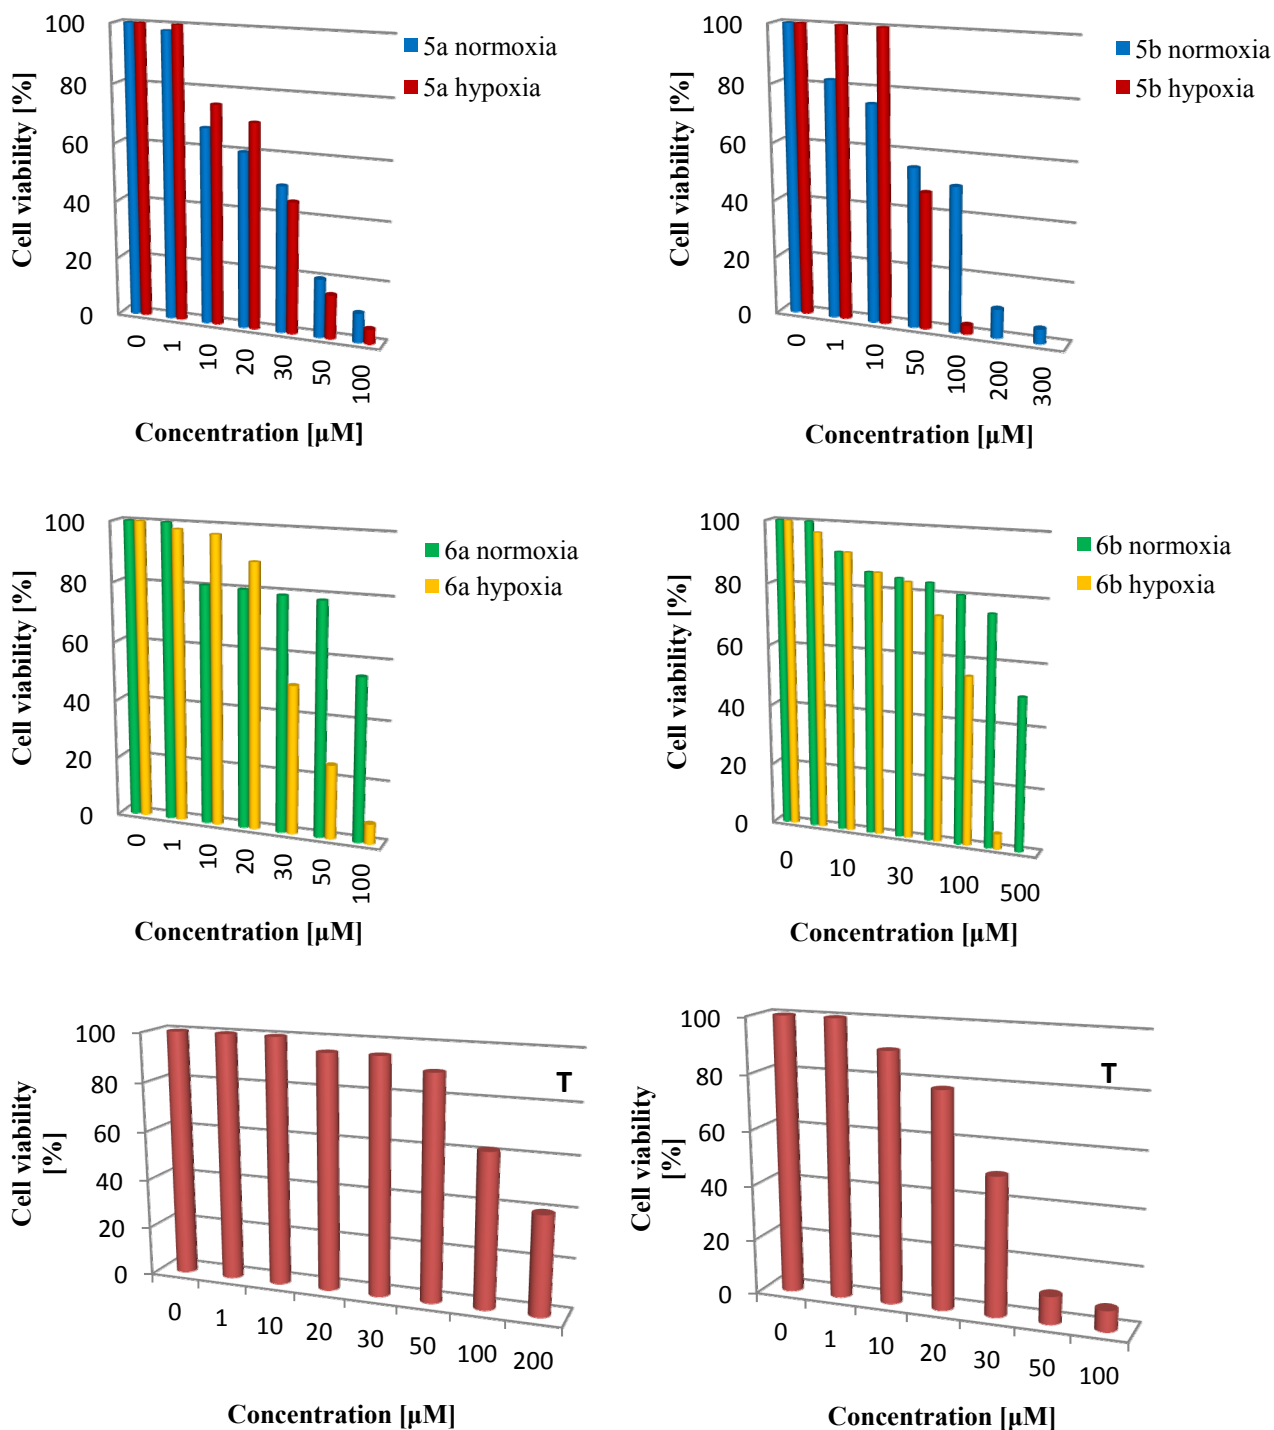

Supplement: molecules-19-00400-s001.pdf [file molecules-19-00400-s001.pdf]
